# Supplementary material
Source: HighWire-hosted journal article supplement (http://jneurosci.org/highwire/filestream/600379/field_highwire_adjunct_files/2/fig_3.pdf)

characteristic path length  $\lambda$  - IQ

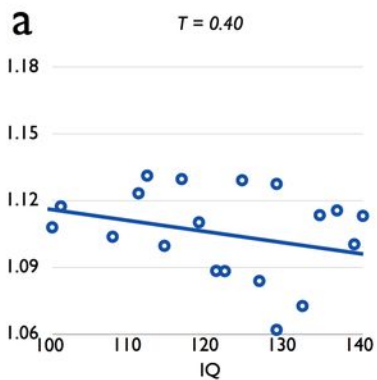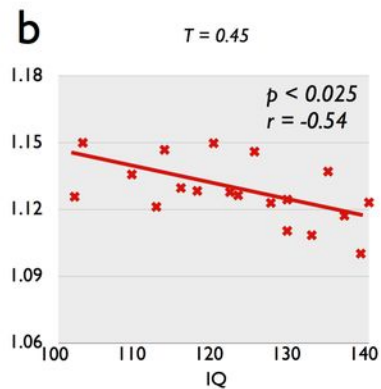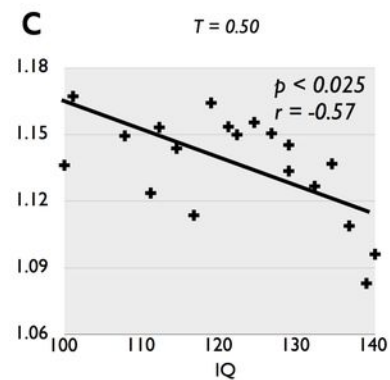

clustering-coefficient  $\gamma$  - IQ

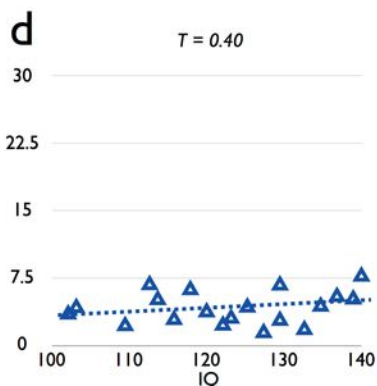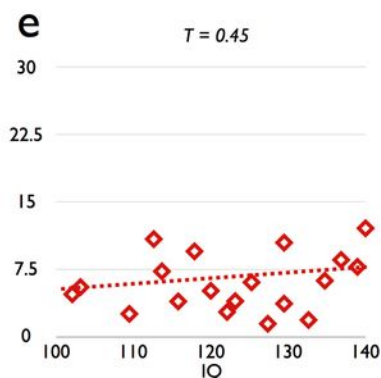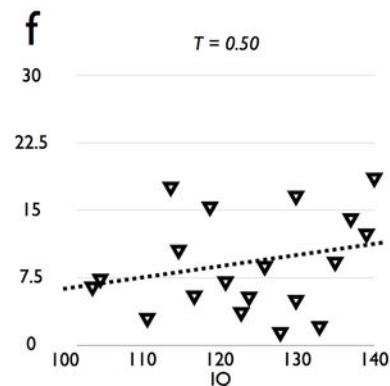

number of connections  $k$  - IQ

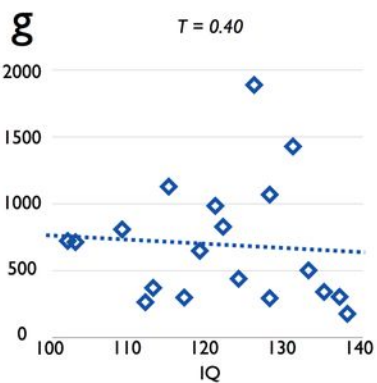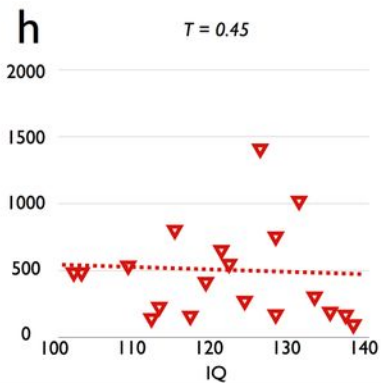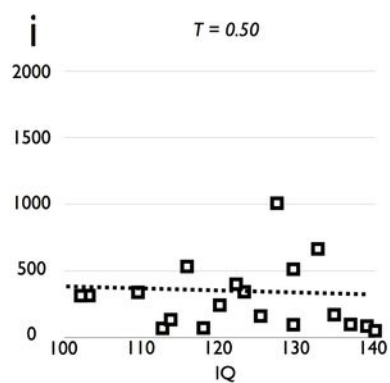

Supplement: fig_3.pdf [file fig_3.pdf]
